# Supplementary material
Source: PubMed Central journal article supplement (PMC8501330)
Supplement: 11126_2021_9962_MOESM1_ESM.pdf [file 11126_2021_9962_MOESM1_ESM.pdf]

## Supplementary Survey (translated English version)

### IMPACT OF WEARING A FACE MASK ON THE PSYCHIATRIC INTERVIEW

1. **Your age**
2. **Your gender (1 answer possible)**
  - Female
  - Male
3. **Your subspecialty (1 possible answer)**
  - Adult psychiatrist
  - Child and Adolescent psychiatrist
  - Old Age psychiatrist
  - Addictologist
  - Trainee psychiatrist
4. **You have been practicing psychiatry for (1 answer possible)**
  - Less than 5 years
  - 5-15 years old
  - 15-25 years old
  - 25-40 years
5. **The majority of your patients are individuals with (multiple answers possible)**
  - Psychotic disorder
  - Mood disorder (depression and/or bipolar disorder)
  - Anxiety disorder
  - Substance use disorder
  - Personality disorders
  - Autism Spectrum Disorder
  - Child and adolescent disorders
6. **Outside the COVID setting, you see patients as (multiple answers possible)**
  - Inpatients (e.g., during a medical visit/tour)
  - Outpatients
7. **Outside the COVID context, per week, you see (1 possible answer)**
  - < 5 patients per week
  - 5-10 patients per week
  - 10-30 patients per week
  - 30-50 patients per week
  - > 50 patients per week
8. **Currently, during your consultations, you wear a face mask (1 answer possible)**
  - All the time
  - Sometimes
  - Never
9. **Currently, during your consultations, the patient wears a face mask (1 possible answer)**
  - All the time
  - Sometimes
  - Never
10. **In your experience, when YOU wear a mask, consultations (1 possible answer)**
  - Longer
  - Less time
  - Similar in length
11. **When YOU wear a mask, the collection of clinical signs is (2 possible answers)**
  - Very biased based on verbal communication
  - Very biased from non-verbal communication
  - Biased based on verbal communication
  - Biased based on non-verbal communication
  - Slightly biased from verbal communication
  - Slightly biased from non-verbal communication
  - Unbiased from verbal communication
  - Unbiased from non-verbal communication
12. **When YOU wear a mask, false inferences (e.g., feeling persecuted) can be induced or aggravated in the patient (1 answer possible)**
  - Yes, strongly
  - Yes
  - Possibly
  - No
13. **When YOU wear a mask, the quality of the doctor-patient interaction is (1 answer possible)**
  - Very impaired
  - Impaired
  - Slightly impaired

- Not impaired
- 14. When the PATIENT wears a mask, the collection of clinical signs is (2 possible answers)**
- Very biased when based on verbal communication
  - Very biased when based on non-verbal communication
  - Biased based when based on verbal communication
  - Biased based when based on non-verbal communication
  - Slightly biased when based on verbal communication
  - Slightly biased when based on non-verbal communication
  - Unbiased when based on communication
  - Unbiased when based on non-verbal communication
- 15. When the PATIENT wears a mask, false inferences or beliefs (e.g. feeling persecuted) can be induced or aggravated in the patient (1 answer possible)**
- Yes, strongly
  - Yes
  - Possibly
- 16. In your experience, when the PATIENT wears a mask, the quality of the doctor-patient interaction is (1 answer possible)**
- Very deteriorated
  - Deteriorated
  - Slightly deteriorated
  - Not deteriorated
- 17. The use of face masks has a negative impact on the construction of the therapeutic alliance (1 answer possible)**
- Yes
  - No
- 18. Do you think that telepsychiatry using videoconferencing is a tool (1 possible answer)**
- Very useful
  - Useful
  - Not very useful
  - Not useful
- 19. During the period of confinement due to COVID-19, the new organization and rules to follow concerning the wearing of masks (1 possible answer)**
- Have not deteriorated my consultation practice
  - Have slightly deteriorated the quality of my consultation practice
  - Have deteriorated the quality of my consultation practice
  - Have greatly deteriorated the quality of my consultation practice
- 20. The new organization and rules to be followed during the confinement related to the COVID-19 allowed you to acquire new skills in telepsychiatry (1 possible answer)**
- Yes
  - No
- 21. During the COVID-19 containment period, you saw by telepsychiatry (1 possible answer)**
- No patients
  - < 5 patients per week
  - 5-10 patients per week
  - 10-30 patients per week
  - 30-50 patients per week
  - > 50 patients per week
- 22. How do you feel about the clinical evaluation between in person consultation with masks and with telepsychiatry without masks? (3 possible answers if you have seen patients with telepsychiatry)**
- I have not seen any patients by telepsychiatry
  - Best clinical evaluation in person than telepsychiatry for a first consultation
  - Best clinical evaluation in person than telepsychiatry for unstable patient follow-up
  - Best clinical evaluation in person than telepsychiatry for stable patient follow-up
  - Best clinical evaluation with telepsychiatry than in person than for a first consultation
  - Best clinical evaluation with telepsychiatry than in person for unstable patient follow-up
  - Best clinical evaluation with telepsychiatry than in person for stable patient follow-up
- 23. Do you think that telepsychiatry (without mask) is a good way to avoid the inconvenience of wearing a mask (by the psychiatrist and/or the patient) during the psychiatric interview? (1 possible answer)**
- Yes, totally
  - Yes, possibly
  - No

## Supplementary Figures

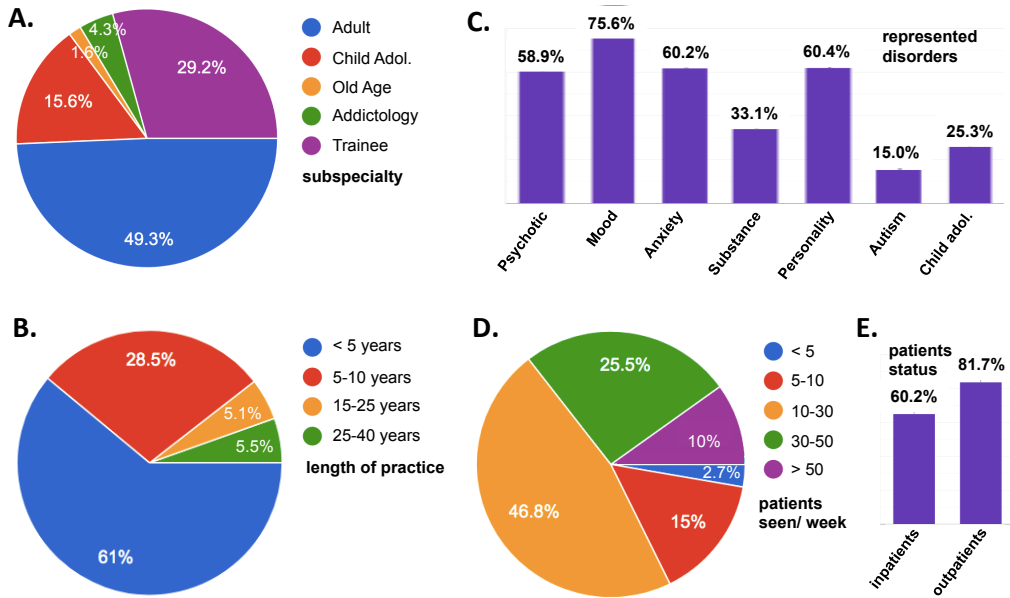

**Figure 1 : Respondents characteristics**

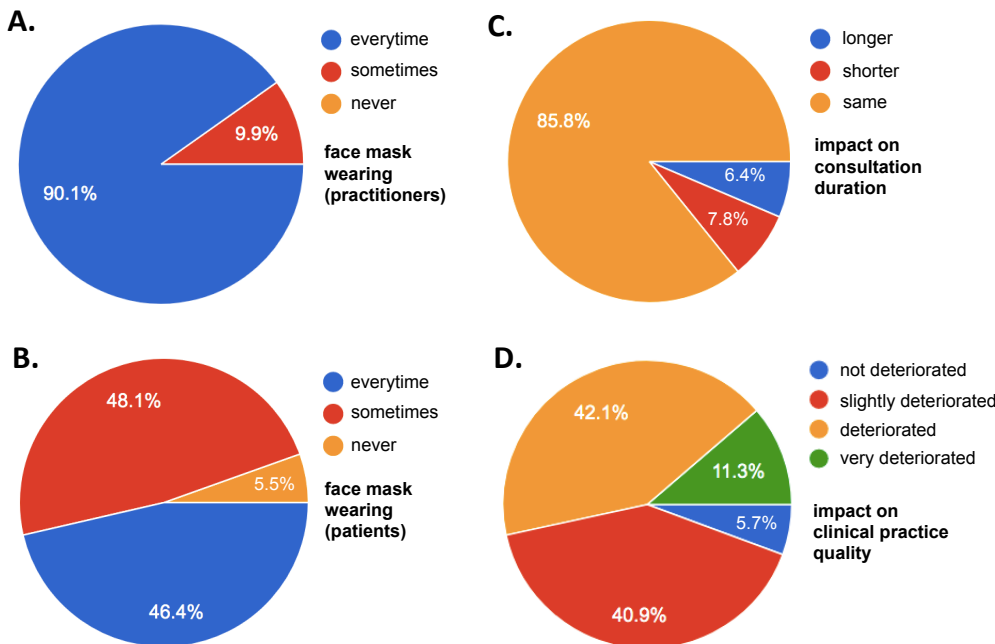

**Figure 2 : Impacts of face mask (1)**

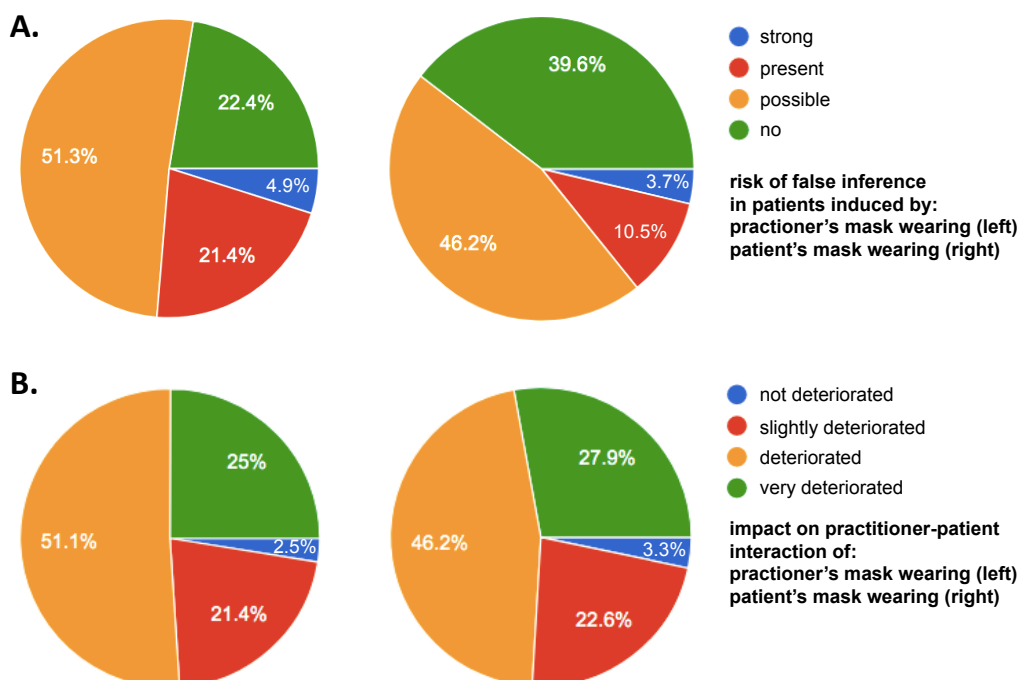

**Figure 3 : Impacts of face mask (2)**

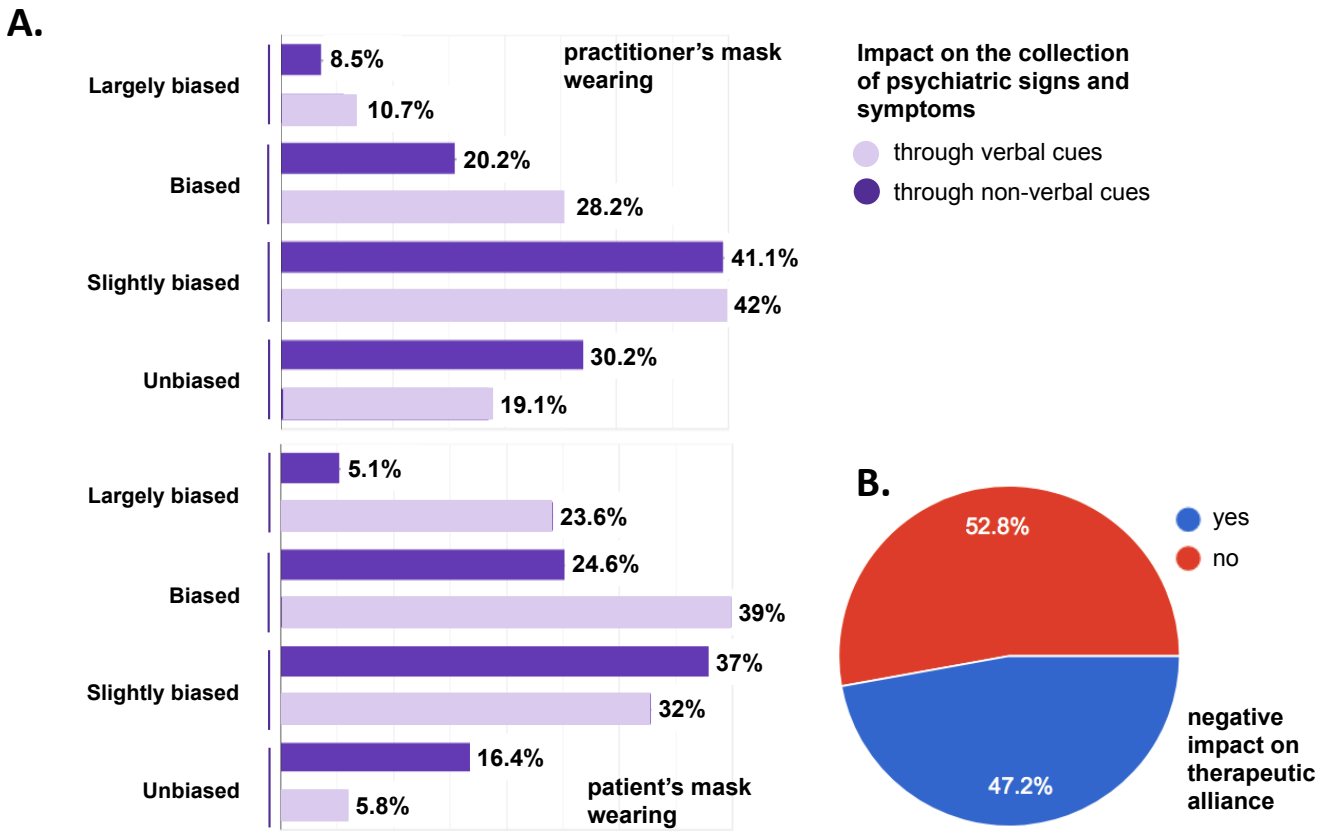

**Figure 4 : Impacts of face mask (3)**

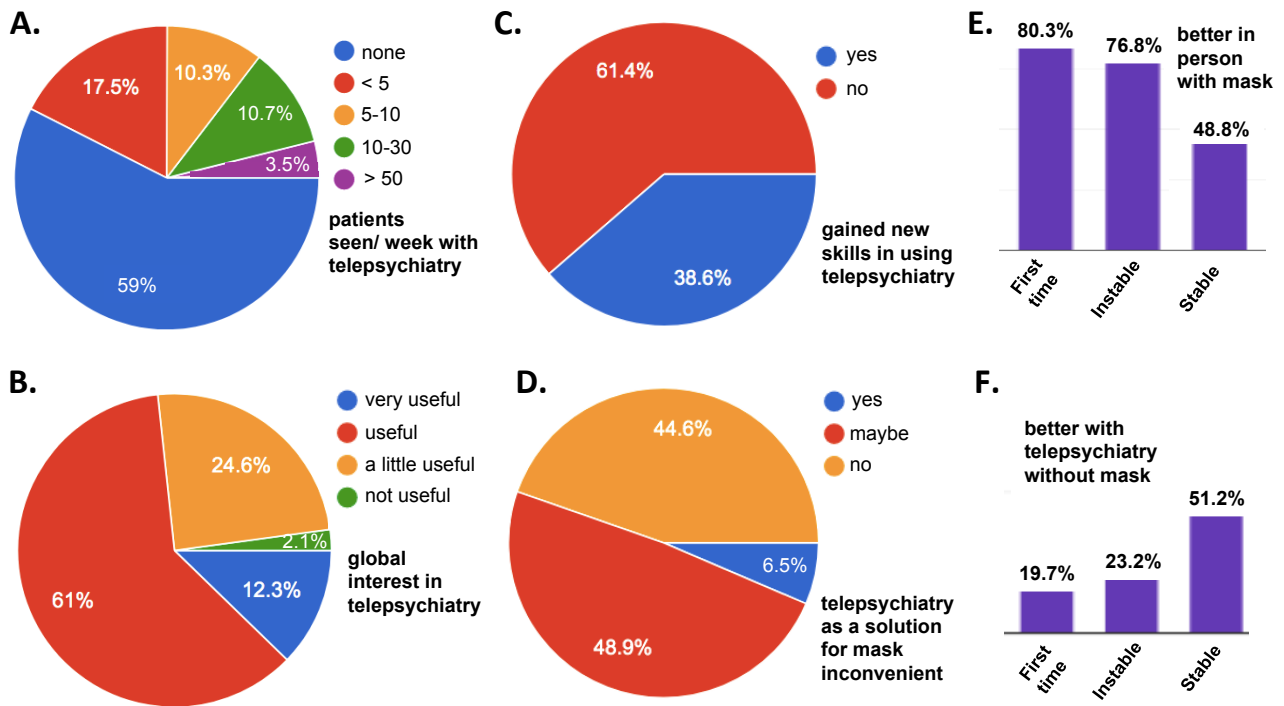

**Figure 5 : Opinions on telepsychiatry**
